# Supplementary material
Source: PubMed Central journal article supplement (PMC5452037)
Supplement: EMBJ-36-1623-s002.pdf [file EMBJ-36-1623-s002.pdf]

## Expanded View Figures

### Figure EV1. DUB cDNA screening identified USP4 as the most potent activator of activin signaling.

- A This graph depicts the activin (5 ng/ml)-induced ARE-Luc transcriptional reporter activity compared to control cells and the effects of a representative set of DUB cDNAs,  $n = 3$ . The top activator USP4 is indicated with an arrow. The data are presented as means  $\pm$  SD.
- B List of the results of screen performed in Appendix Fig S1A.
- C Left panel: effect of USP4 and USP9x on the ARE-Luc transcriptional response induced by activin A (50 ng/ml) in HepG2 cells. Right panel (mentioned in the discussion): USP4, but not the USP9x rescued the defective ARE-Luc response caused by sh-USP4 that target USP4 3'UTR. The data are presented as means  $\pm$  SD. Co.vec, empty vector; Co.sh, non-targeting shRNA. \* indicates statistical significance ( $P < 0.05$ ). Two-tailed, unpaired  $t$ -test. Experiments were performed in triplicate.
- D Q-PCR analysis of *USP4* mRNA level in HepG2 cells infected with lentivirus encoding control (Co.sh) or USP4 shRNA (#1&#2). Experiments were performed in triplicate. Two-tailed, unpaired  $t$ -test. \*\* $P < 0.01$  and \*\*\* $P < 0.001$ . The data are presented as means  $\pm$  SD.

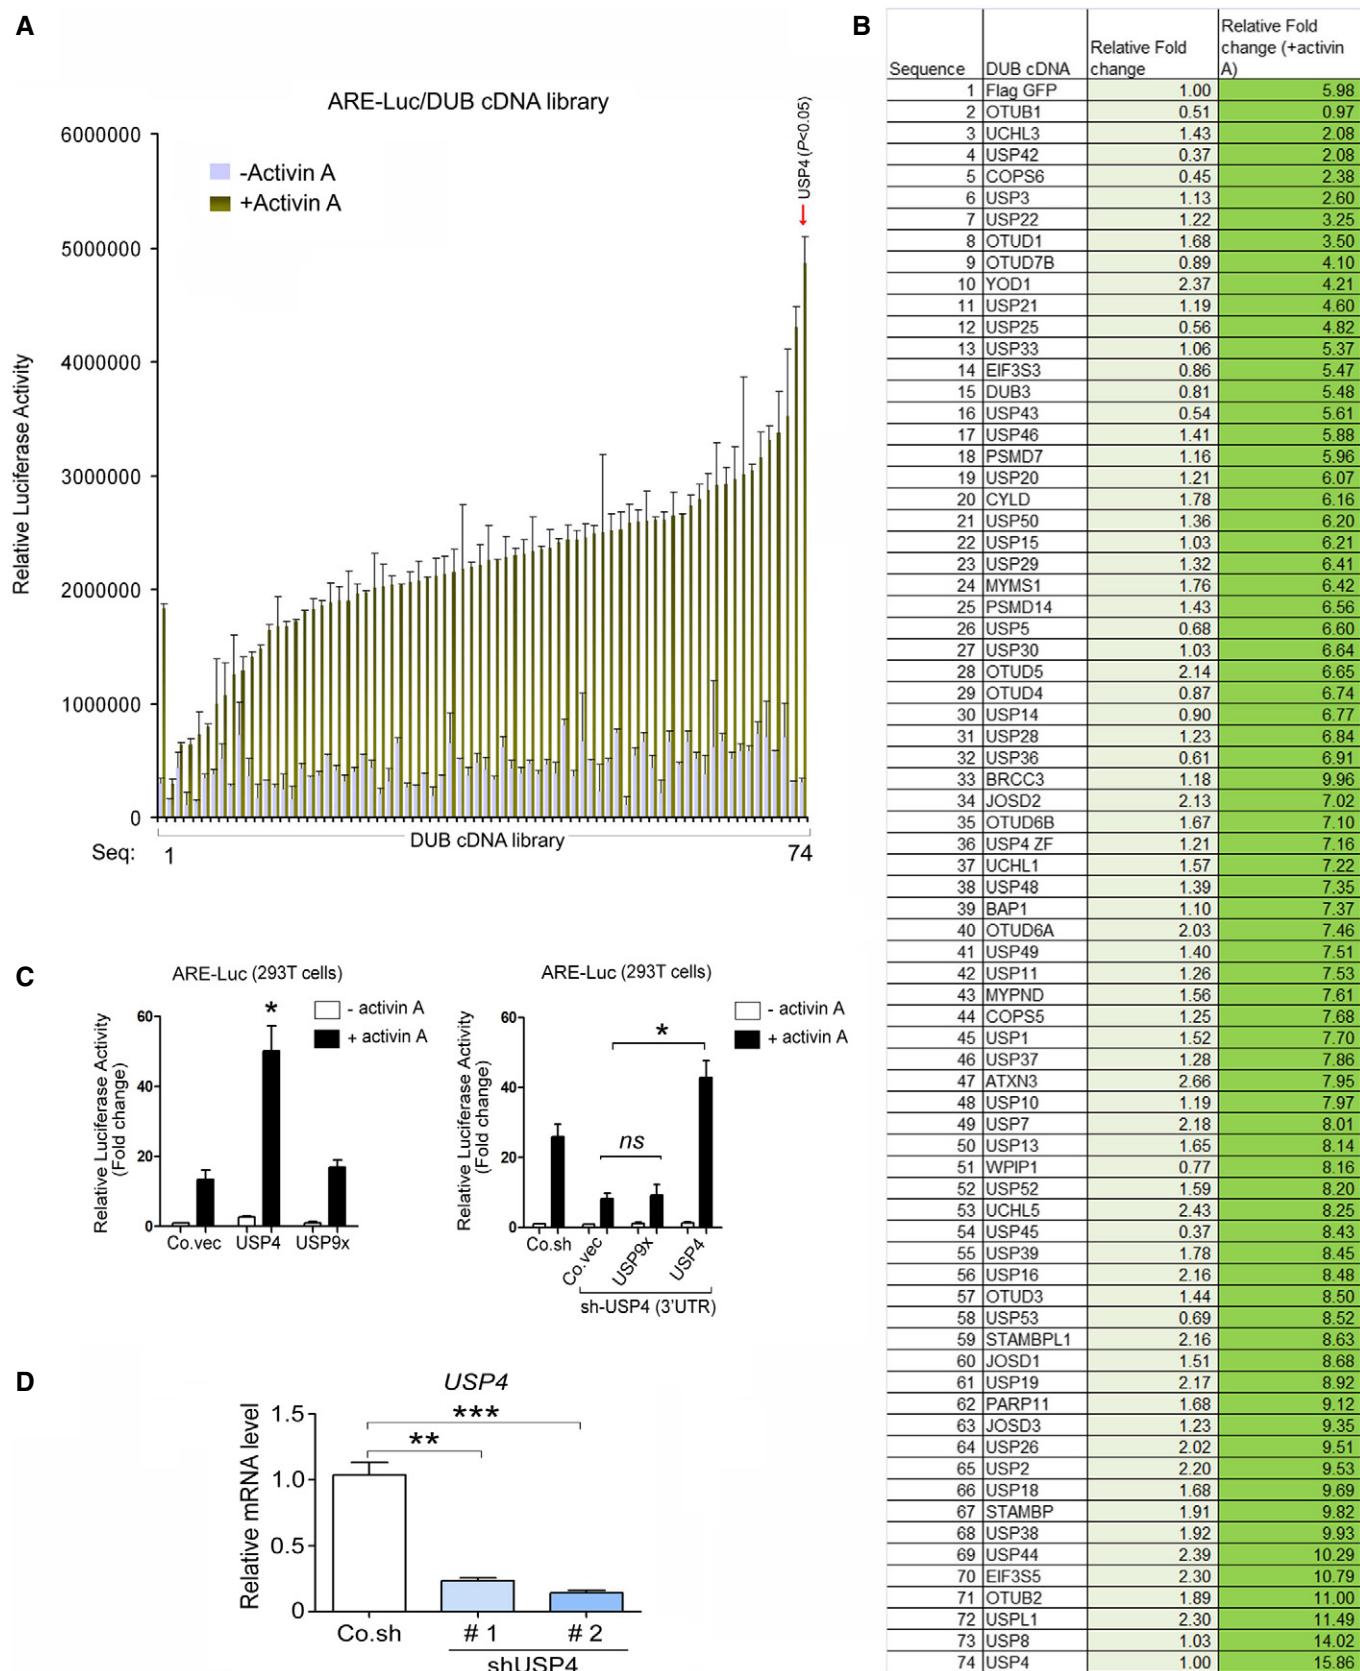

Figure EV1.

**Figure EV2. USP4 is required for BMP-SMAD signaling.**

- A qRT-PCR analysis of activin target genes *SMAD7*, *PAI-1*, *P21*, and *P15* in *USP4*<sup>+/+</sup> and *USP4*<sup>-/-</sup> MEFs in the absence or presence of ectopically expressed USP4-WT or USP4-CS and treated with activin A (50 ng/ml) for 1 h. The values and error bars represent the mean  $\pm$  SD of triplicate assays and at least two independent experiments.
- B, C The effect of USP4 wild-type (USP4-WT) and the USP4 mutant in which the de-ubiquitinating enzyme activity is inactive (USP4-CS) (B) or USP4 knockdown (shUSP4 #1 and #2) (C) on the BRE-Luc transcriptional response induced by BMP6 (25 ng/ml) in HepG2 cells. These data are presented as the means  $\pm$  SD ( $n = 3$ ). Co.vec, empty vector; Co.sh, non-targeting shRNA.
- D, E Immunoprecipitation (IP) and immunoblotting (IB) analyses of SMAD1/5-SMAD4 complex formation and SMAD1/5 phosphorylation in HepG2 cells that stably overexpressed USP4-WT or USP4-CS (D) or in which stable knockdown of USP4 by shRNA (shUSP4 #1 and #2) (E) was achieved and after stimulation with BMP6 (25 ng/ml) for the indicated times. IB for actin on TCL is included as loading control.
- F, G Effect of morpholino-mediated depletion of *usp4* on *activin*- and *bmp4*-induced phenotype as measured by expression of *gata5* and *sox32* (F) and *eve1* and *bmp2* (G). These figures relate to Fig 1I and J.
- H The relative expression levels of zebrafish *vox* and *vent* as determined by qRT-PCR. The quantified mRNA levels were normalized to  $\beta$ -actin mRNA level and are presented relative to control embryos. \* indicates statistical significance ( $P < 0.05$ ), and \*\* indicates statistical significance ( $P < 0.005$ ). Two-tailed, unpaired *t*-test. These data are presented as the means  $\pm$  SD ( $n = 3$ ).

Source data are available online for this figure.

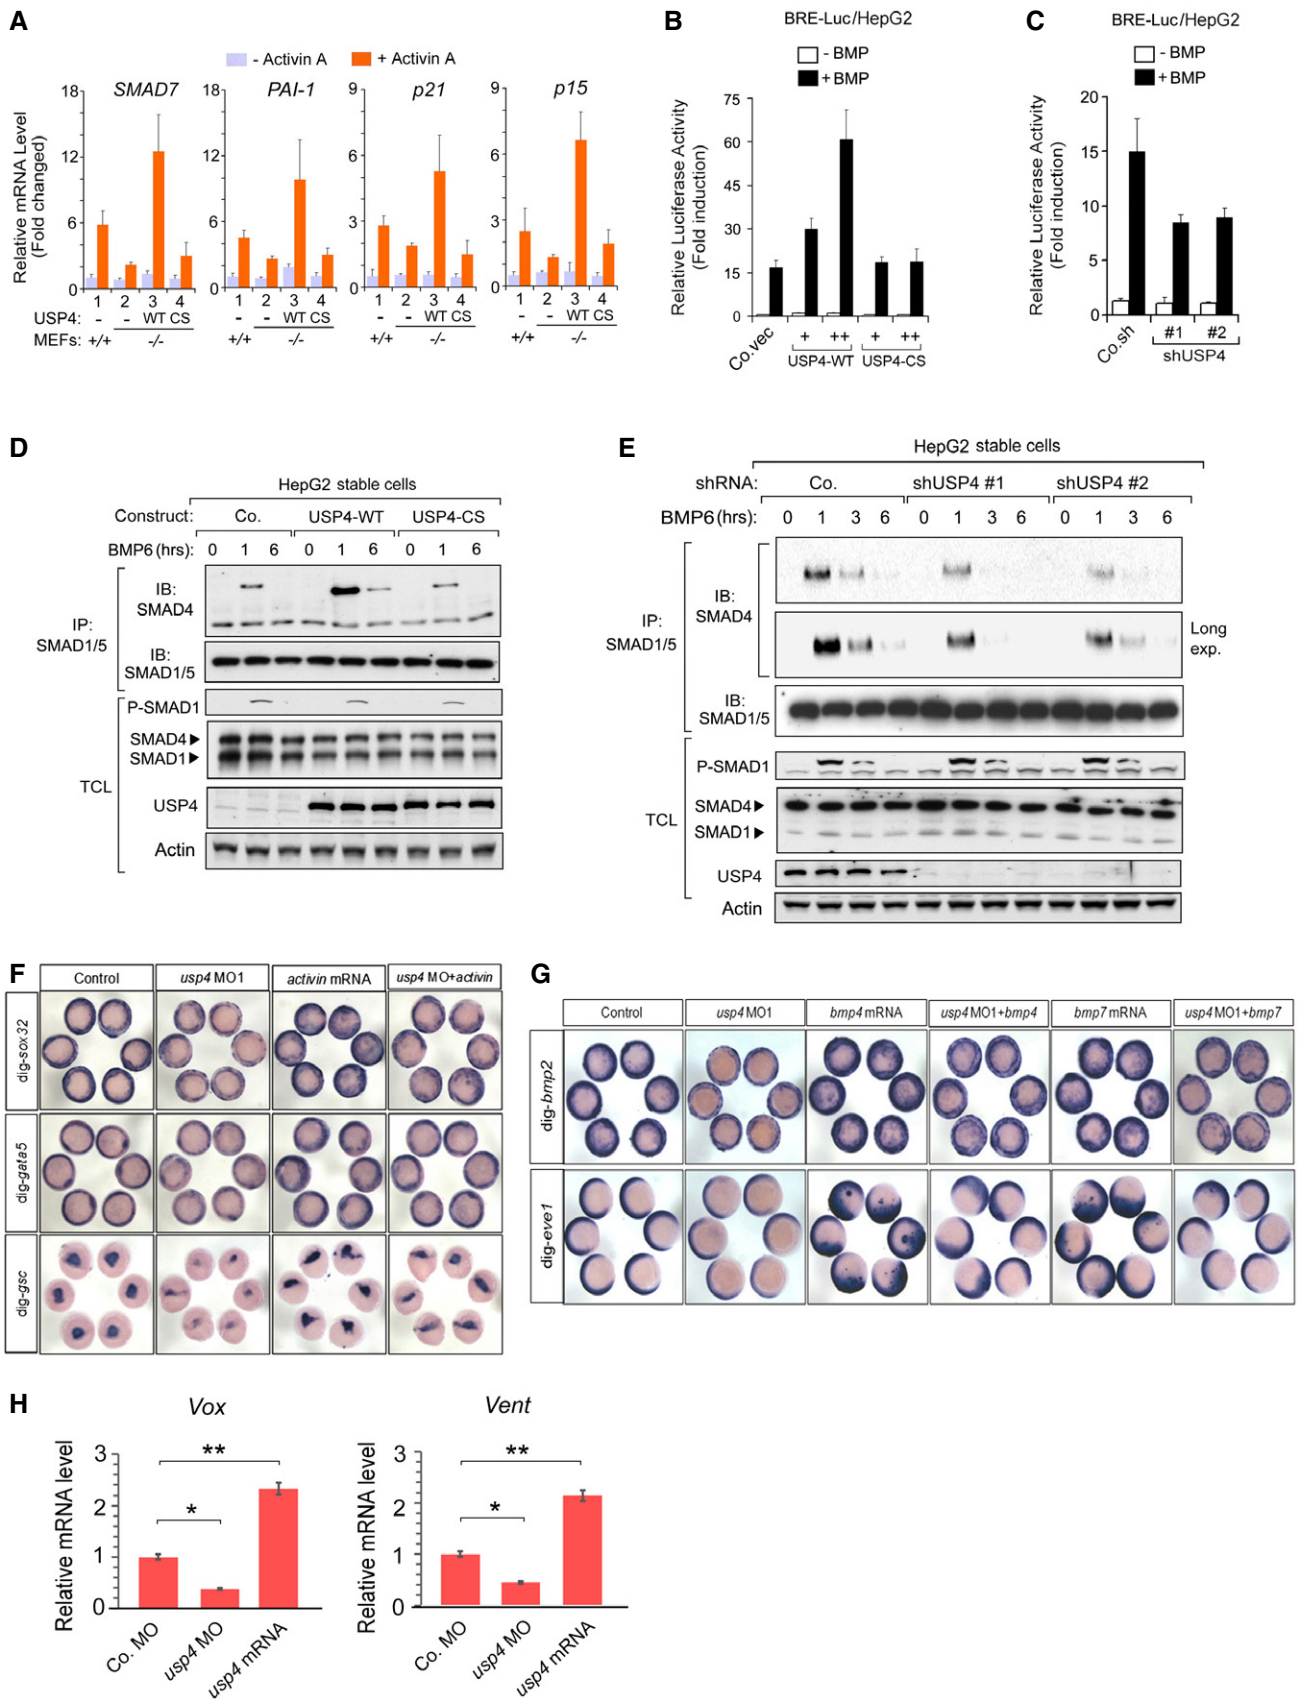

Figure EV2.

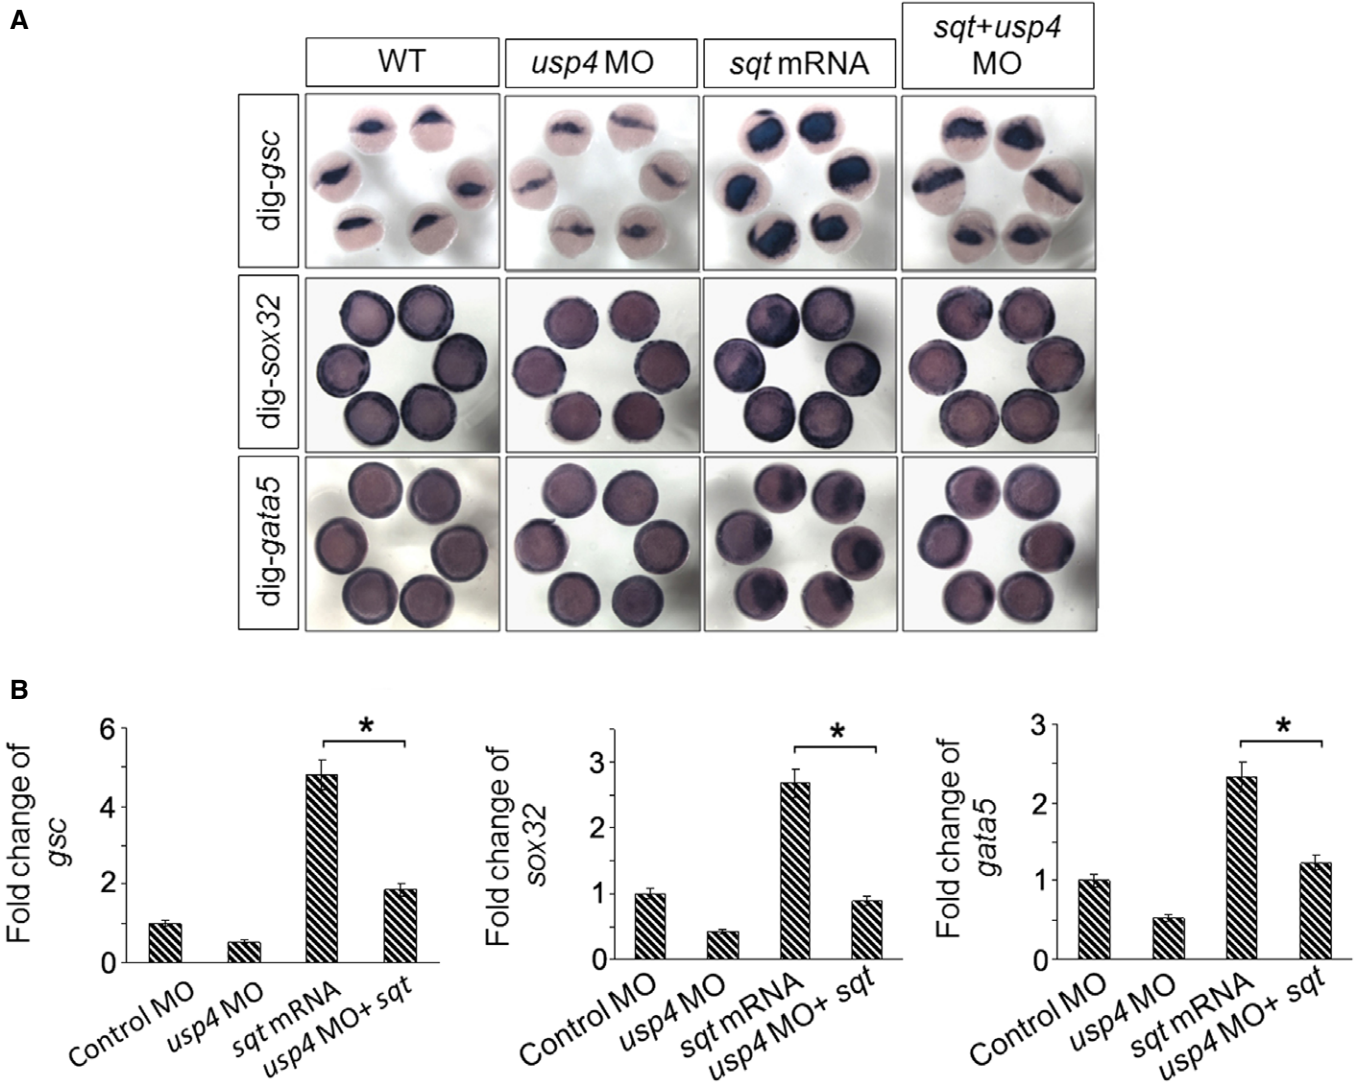

**Figure EV3. Genetic interaction between zebrafish *usp4* and *sqt*.**

**A** The depletion of *usp4* partially inhibited the *sqt*-induced phenotype. Single-cell embryos were injected with control MO, *usp4* MO, *sqt* mRNA, or their combination. Embryos at the shield stage or 70% epiboly stage were fixed and hybridized with probes for markers of the endoderm and mesoderm including *sox32*, *gata5*, and *gooseoid* (*gsc*). Each group of embryos is oriented differently: animal pole view for *sox32*, and *gata5* panels; organizer view for the *gsc* panel.

**B** The relative expression levels of zebrafish *gooseoid* (*gsc*), *sox32*, and *gata5* were monitored by quantitative real-time PCR (qRT-PCR). The quantified mRNA levels were normalized to  $\beta$ -actin and are presented relative to the control embryos. \* indicates statistical significance ( $P < 0.05$ ). Two-tailed, unpaired *t*-test. Experiments were performed on at least three independent injected embryos. These data are presented as the means  $\pm$  SD.

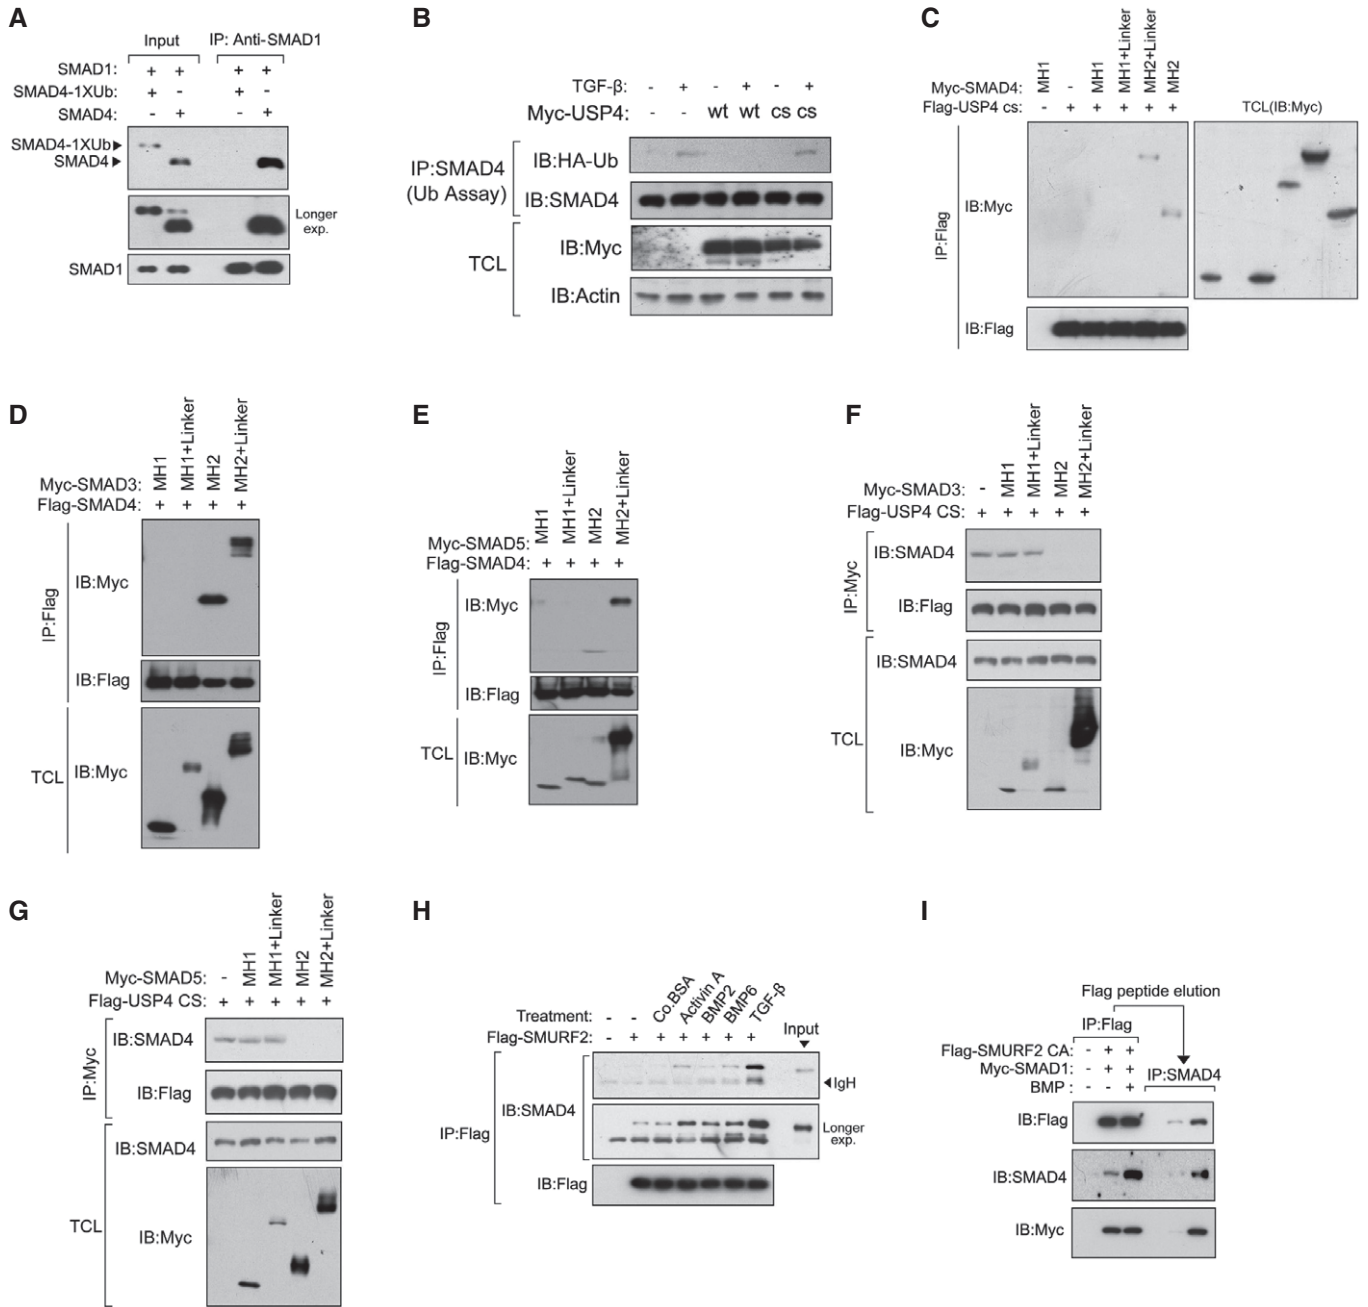

**Figure EV4. Regulation of SMAD4 monoubiquitination.**

- A R-SMAD preferred to associate with free SMAD4 rather than monoubiquitinated SMAD4. IB analysis of the input and immunoprecipitates derived from the incubation of purified SMAD1 with SMAD4 or SMAD4 -1xUb.
- B USP4 prevented the monoubiquitination of SMAD4 upon stimulation of cells with TGF- $\beta$ . IB analysis of total cell lysates (TCL) and immunoprecipitates derived from HA-Ub expressing HEK293T cells that were transfected with Myc-USP4 wild-type (WT) or Myc-USP4 C311S mutant (CS), with or without TGF- $\beta$  treatment (5 ng/ml) for 1 h.
- C USP4 bound to the SMAD4 MH2 domain. HEK293T cells were transfected with Myc-tagged SMAD4 deletions and Flag-tagged USP4 CS. The cells were harvested for immunoprecipitation (IP) with anti-Flag affinity resin and subjected to IB analysis with indicated antibodies (left panel). TCL were analyzed by IB using myc antibodies (right panel).
- D, E The SMAD4 bound to the MH2 domain of SMAD3 or SMAD5. HEK293T cells were transfected with Myc-tagged SMAD3 deletions (D) or SMAD5 deletion (E) and Flag-tagged SMAD4. The cells were harvested for IP with anti-Flag affinity resin and IB with the indicated antibodies (upper two panels). TCL were analyzed by IB using myc antibodies (bottom panel).
- F, G The MH2 domain of SMAD3 or SMAD5 displaced USP4 from SMAD4. IB analysis of total cell lysate (TCL) and immunoprecipitates derived from HEK293T cells that were transfected with Flag-USP4 CS and Myc-SMAD3 (F) or Myc-SMAD5 (G) deletions as indicated.
- H IB analysis of immunoprecipitates derived from Flag-SMURF2-transfected HEK293T cells treated with or without activin A (50 ng/ml), BMP2 (50 ng/ml), or TGF- $\beta$  (5 ng/ml) for 1 h.
- I BMP6 promoted the formation of a trimeric complex of SMURF2, SMAD1, and SMAD4. Flag-SMURF2 CA and Myc-SMAD1 were co-expressed in HEK293T cells. The cells were treated with BMP6 (50 ng/ml) for 1 h and then harvested for immunoprecipitation with anti-Flag beads and elution with Flag-peptide. The second IP with anti-SMAD4 antibody was performed, and the resulting samples were subjected to IB with anti-Flag, anti-SMAD4, or anti-Myc antibodies.

Source data are available online for this figure.

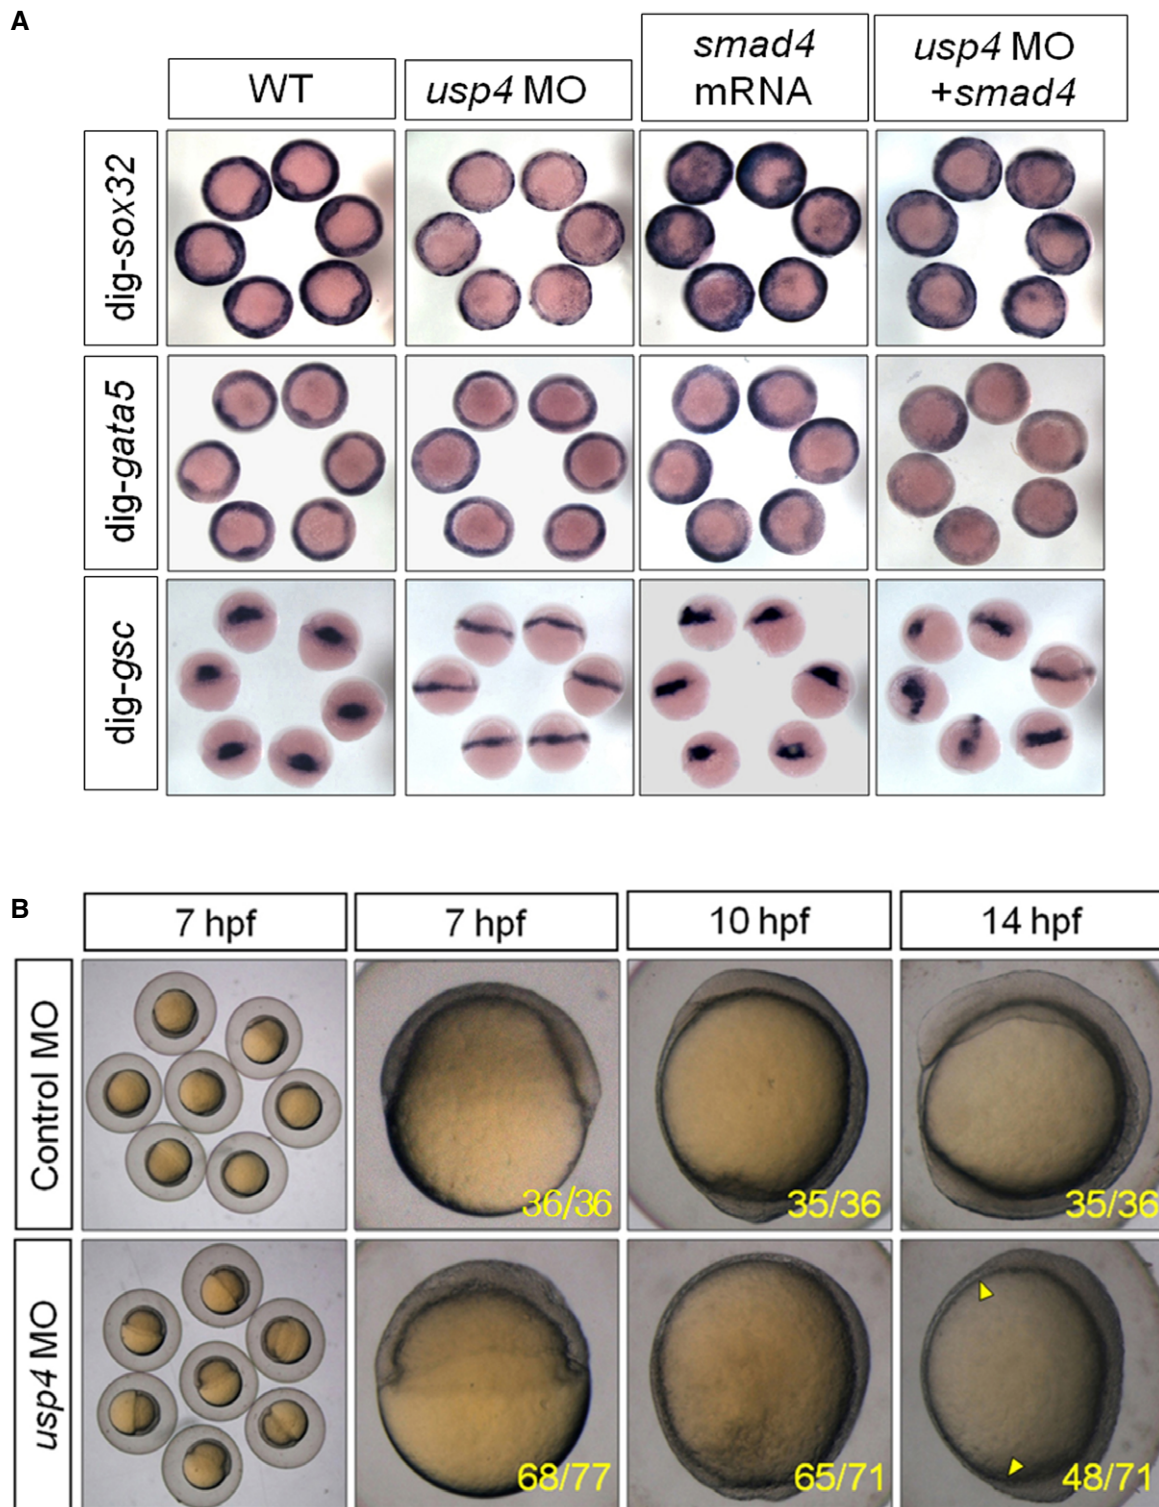

**Figure EV5. Effect of *usp4* morphants on embryonic cell movements.**

A Related to Fig 7A, overview of zebrafish embryos. The *usp4* depletion partially inhibits *smad4*-induced phenotype. Single-cell embryos were injected with control morpholino (MO), *usp4* MO, *smad4* mRNA, or their combination (as indicated).

B Injection of *usp4* morpholino led to impaired epiboly and convergent extension (CE) movement. Single-cell embryos were injected with *usp4* MO or control morpholino (control MO). The stages of the embryos are shown, and the number of described embryos and total number are listed in the bottom.
